# Supplementary material for: First detection and prevalence of Apis mellifera filamentous virus in Apis mellifera and Varroa destructor in the Republic of Korea
Source: PubMed Central journal article supplement (PMC11189470; doi:10.1038/s41598-024-64882-z), 2024-06-19
Supplement: 41598_2024_64882_MOESM2_ESM.pdf [file 41598_2024_64882_MOESM2_ESM.pdf]

## Supplementary Information 1

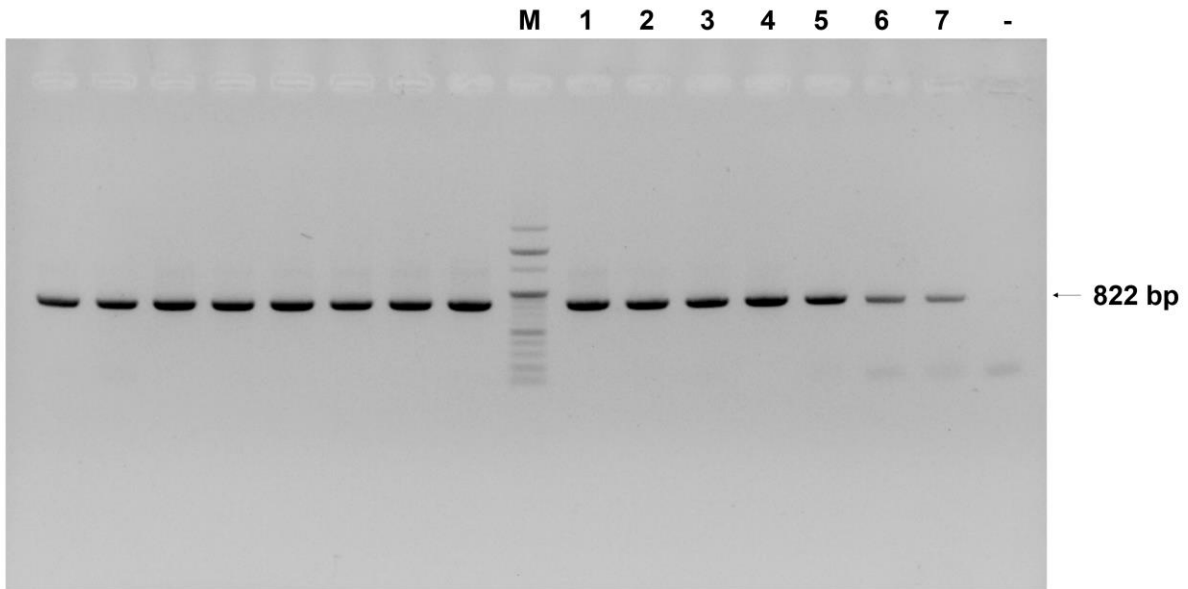

**Supplementary Figure 2. Original gel used to prepare Figure 2a.** M: 100-bp DNA ladder (Enzynomics, Daejeon, ROK); lanes 1 to 7: PCR performed with DNA template of honeybee samples; (-): PCR without DNA template. AmFV, *Apis mellifera* filamentous virus; PCR, polymerase chain reaction; ROK, Republic of Korea.
