# Supplementary material for: First detection and prevalence of Apis mellifera filamentous virus in Apis mellifera and Varroa destructor in the Republic of Korea
Source: PubMed Central journal article supplement (PMC11189470; doi:10.1038/s41598-024-64882-z), 2024-06-19
Supplement: 41598_2024_64882_MOESM3_ESM.pdf [file 41598_2024_64882_MOESM3_ESM.pdf]

## Supplementary Information 2

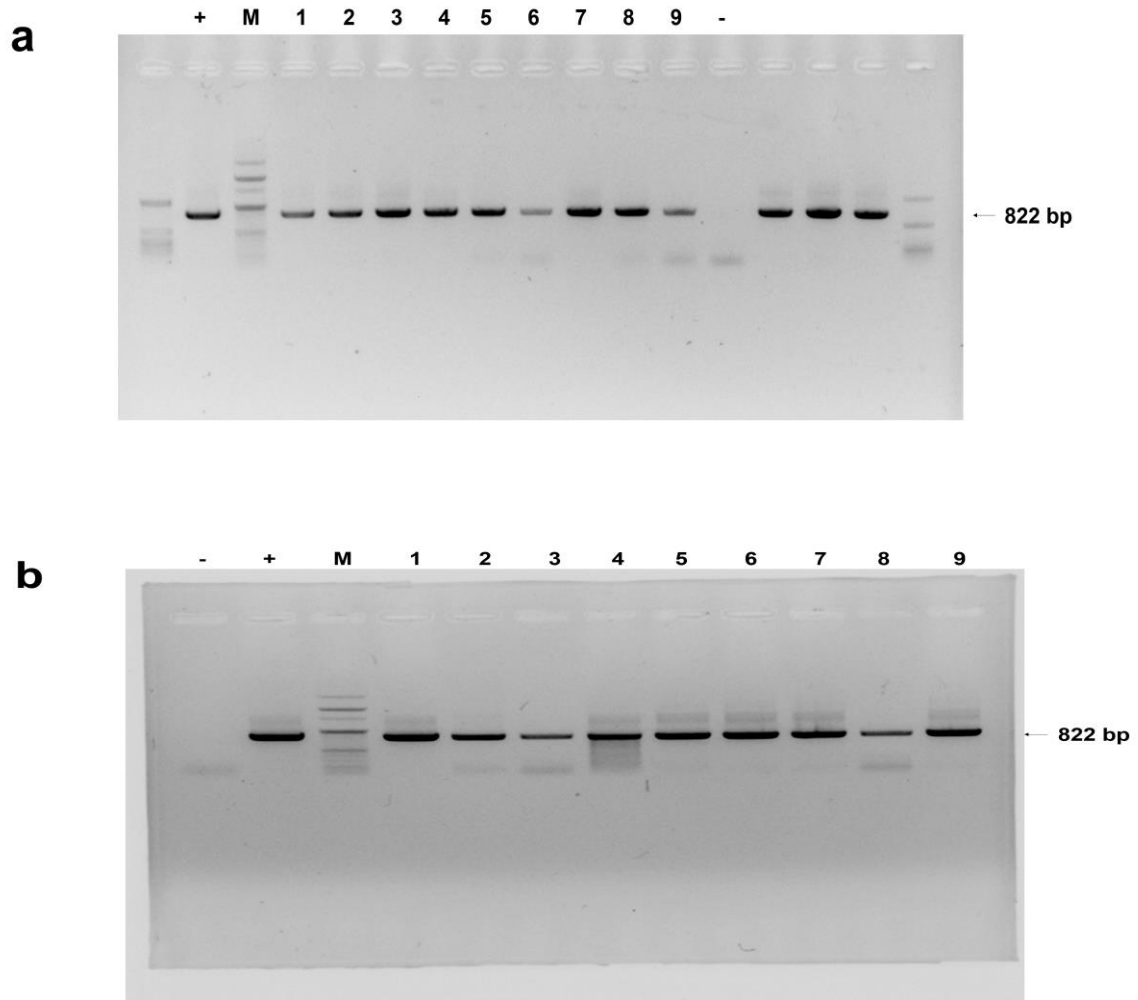

**Supplementary Figure S3. Original gels used to prepare Figure 4a–b.** *Apis mellifera* filamentous virus (AmFV) detection in *Varroa destructor* mites and honeybee samples. (a) Lanes 1–9 indicate polymerase chain reaction products obtained from *V. destructor* mite samples, (b) lanes 1–9 indicate polymerase chain reaction products obtained from honeybee samples; M, 100-bp DNA ladder (Enzymomics, Daejeon, ROK); (+), positive control: PCR using plasmid of *Bro-N* gene cloned pGem–T vector as DNA template; (–), negative control: PCR without DNA template.
